# Supplementary material for: Synthesis of the first 2-hydroxyanthraquinone substituted cyclotriphosphazenes and their cytotoxic properties
Source: Royal Society of Chemistry journal article supplement (doi:10.1039/d0nj02723e), 2020-01-01
Supplement: d0nj02723e1.pdf [file d0nj02723e1.pdf]

## SUPPLEMENTARY FILE

# Synthesis of the First 2-Hydroxyanthraquinone Substituted Cyclotriphosphazenes and Their Cytotoxic Properties

Gönül Yenilmez Çiftçi\*<sup>a</sup>, Nagihan Bayık <sup>a</sup>, Esra Tanrıverdi Eçik<sup>b</sup>, Elif Şenkuytu<sup>b</sup>,

Masuk Aksahin<sup>c</sup>, Tuba Yıldırım<sup>d</sup>

\*Correspondence: [yenilmez@gtu.edu.tr](mailto:yenilmez@gtu.edu.tr)

<sup>a</sup>Department of Chemistry, Faculty of Sciences, Gebze Technical University, Gebze, Kocaeli, Turkey

<sup>b</sup>Department of Chemistry, Faculty of Sciences, Ataturk University, 25240, Erzurum, Turkey

<sup>c</sup>Department of Biotechnology, Graduate School of Natural and Applied Sciences, Amasya University, 05100, Amasya, Turkey

<sup>d</sup>Department of Biology, Faculty of Arts and Sciences, Amasya University, 05100, Amasya, Turkey

\* Corresponding author

Phone: +90 262 6053011 Fax: +90 262 6053005

E-mail: [yenilmez@gtu.edu.tr](mailto:yenilmez@gtu.edu.tr)

## CONTENTS

### Contents of Figures

|                                                                                                                                                                                                      |    |
|------------------------------------------------------------------------------------------------------------------------------------------------------------------------------------------------------|----|
| <b>Figure S1.</b> MALDI-MS spectra of Compound 6 .....                                                                                                                                               | 4  |
| <b>Figure S2.</b> $^1\text{H}$ NMR spectra of Compound 6 in $\text{CDCl}_3$ .....                                                                                                                    | 4  |
| <b>Figure S3.</b> $^{13}\text{C}$ NMR spectra of Compound 6 in $\text{DMSO-d}_6$ .....                                                                                                               | 5  |
| <b>Figure S4.</b> $^{31}\text{P}$ NMR decoupled spectra of Compound 6 in $\text{CDCl}_3$ .....                                                                                                       | 5  |
| <b>Figure S5.</b> FT-IR spectra of Compound 6 .....                                                                                                                                                  | 6  |
| <b>Figure S6.</b> MALDI-MS spectra of Compound 7 .....                                                                                                                                               | 7  |
| <b>Figure S7.</b> $^1\text{H}$ NMR spectra of Compound 7 in $\text{CDCl}_3$ .....                                                                                                                    | 7  |
| <b>Figure S8.</b> $^{13}\text{C}$ NMR spectra of Compound 7 in $\text{DMSO-d}_6$ .....                                                                                                               | 8  |
| <b>Figure S9.</b> $^{31}\text{P}$ NMR decoupled spectra of Compound 7 in $\text{CDCl}_3$ .....                                                                                                       | 8  |
| <b>Figure S10.</b> FT-IR spectra of Compound 7 .....                                                                                                                                                 | 9  |
| <b>Figure S11.</b> MALDI-MS spectra of Compound 8 .....                                                                                                                                              | 10 |
| <b>Figure S12.</b> $^1\text{H}$ NMR spectra of Compound 8 in $\text{CDCl}_3$ .....                                                                                                                   | 10 |
| <b>Figure S13.</b> $^{13}\text{C}$ NMR spectra of Compound 8 in $\text{DMSO-d}_6$ .....                                                                                                              | 11 |
| <b>Figure S14.</b> $^{31}\text{P}$ NMR decoupled spectra of Compound 8 in $\text{CDCl}_3$ .....                                                                                                      | 11 |
| <b>Figure S15.</b> FT-IR spectra of Compound 8 .....                                                                                                                                                 | 12 |
| <b>Figure S16.</b> MALDI-MS spectra of Compound 9 .....                                                                                                                                              | 13 |
| <b>Figure S17.</b> $^1\text{H}$ NMR spectra of Compound 9 in $\text{CDCl}_3$ .....                                                                                                                   | 13 |
| <b>Figure S18.</b> $^{13}\text{C}$ NMR spectra of Compound 9 in $\text{DMSO-d}_6$ .....                                                                                                              | 14 |
| <b>Figure S19.</b> $^{31}\text{P}$ NMR decoupled spectra of Compound 9 in $\text{CDCl}_3$ .....                                                                                                      | 14 |
| <b>Figure S20.</b> FT-IR spectra of Compound 9 .....                                                                                                                                                 | 15 |
| <b>Figure S21.</b> Graphics of the concentrations values of compounds applied in the MCF-7 and MCF12A cell lines according to viability (%) with MTT method.....                                     | 16 |
| <b>Figure S22.</b> MTT analysis results of compounds in cells. Graphics of the concentrations of compounds applied in the DLD1 and CCD-18CO cell lines according to absorbance with MTT method ..... | 18 |

## **Contents of Tables**

|                                                                                                                                                |    |
|------------------------------------------------------------------------------------------------------------------------------------------------|----|
| <b>Table S1.</b> Selectivity of the cytotoxicity of anthraquinone derivatives compounds to two cancer cells as compared with normal cells..... | 20 |
|------------------------------------------------------------------------------------------------------------------------------------------------|----|

# COMPOUND 6

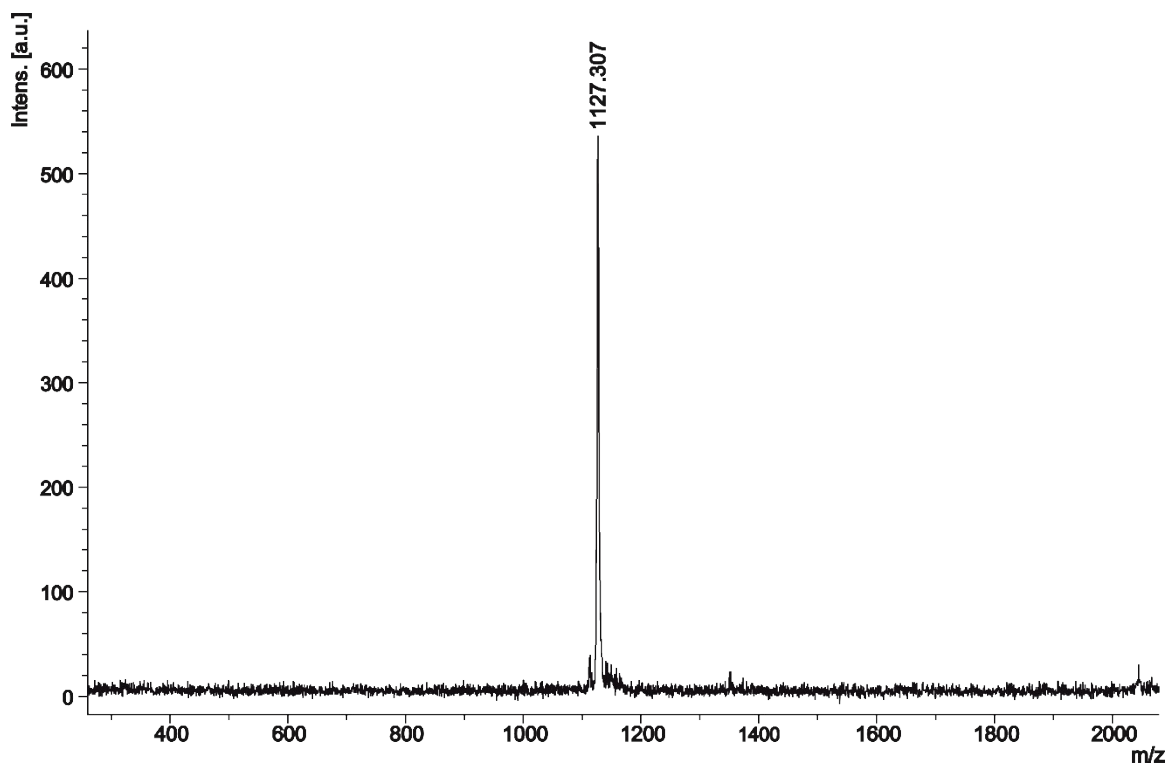

Figure S1. MALDI-MS spectra of Compound 6

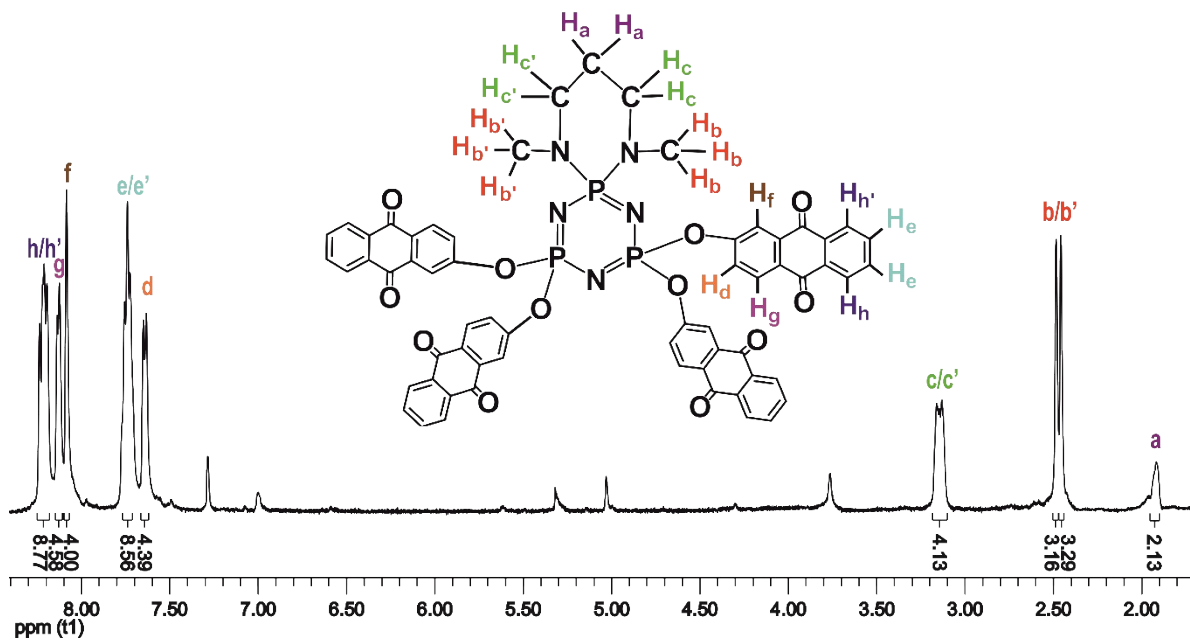

Figure S2. <sup>1</sup>H NMR spectra of Compound 6 in CDCl<sub>3</sub>

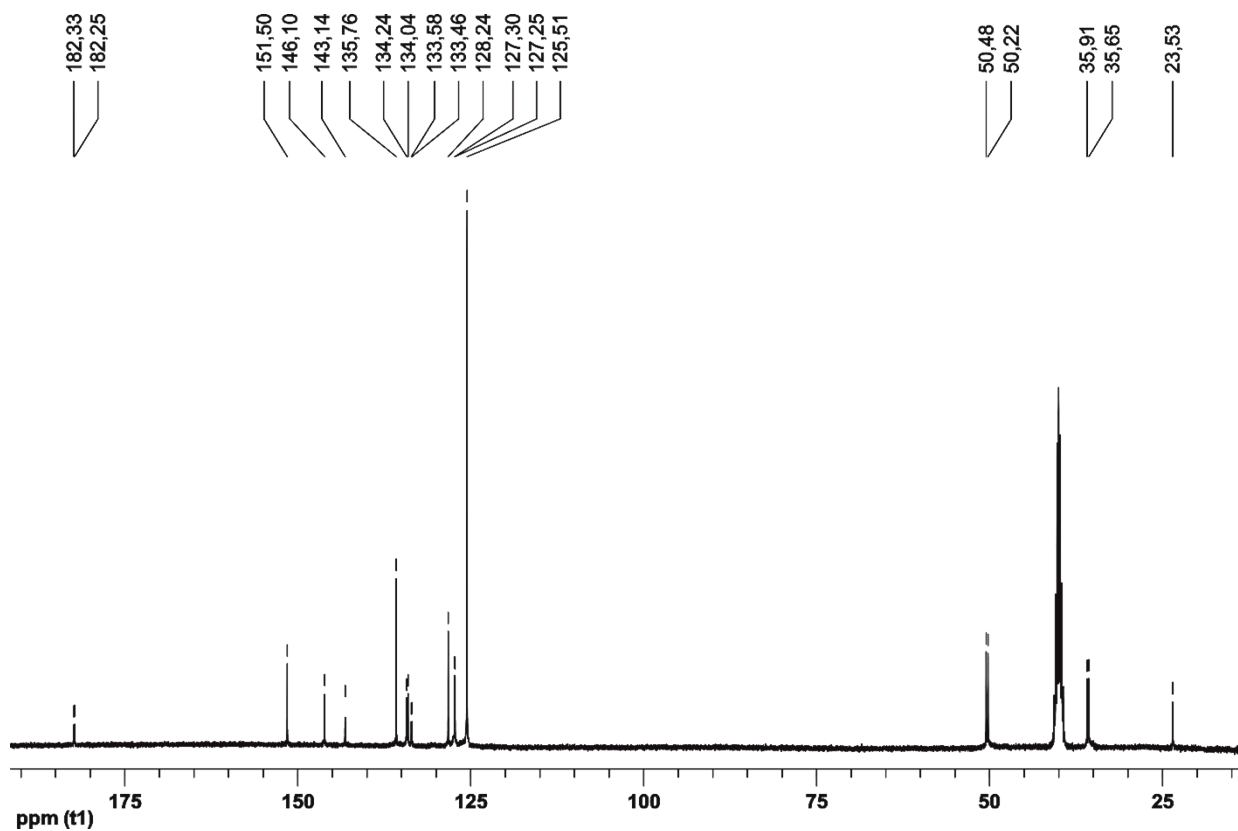

Figure S3.  $^{13}\text{C}$  NMR spectra of Compound 6 in  $\text{DMSO-d}_6$

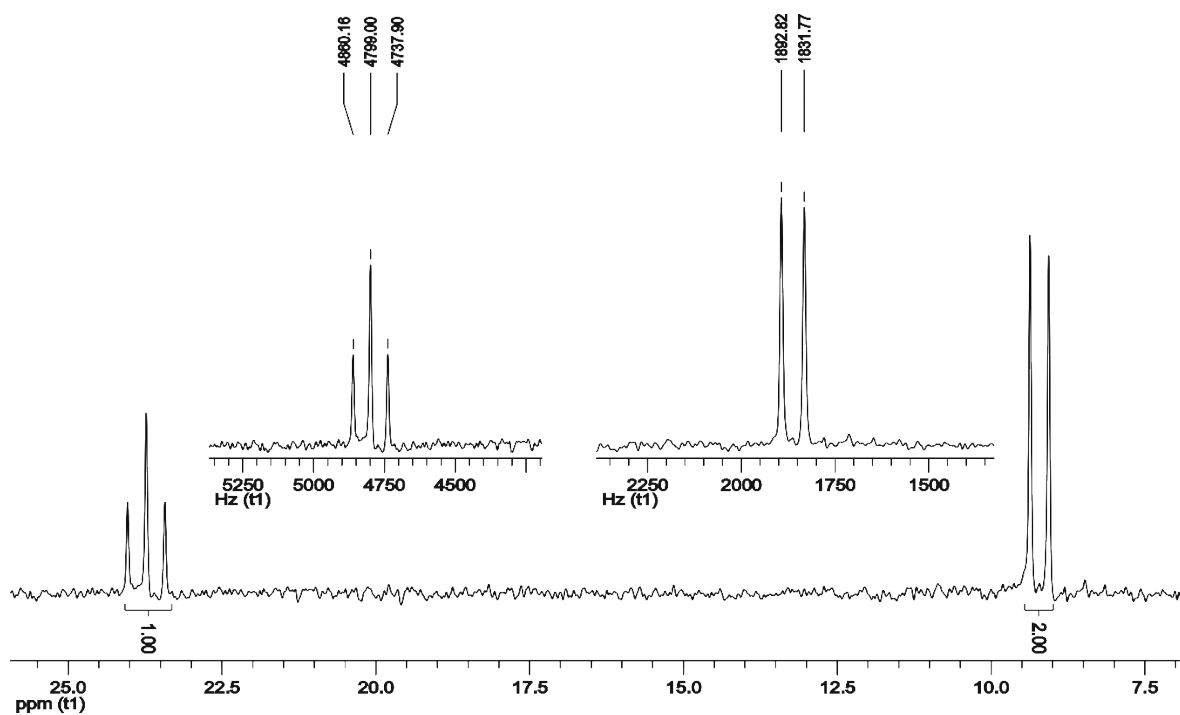

Figure S4.  $^{31}\text{P}$  NMR decoupled spectra of Compound 6 in  $\text{CDCl}_3$

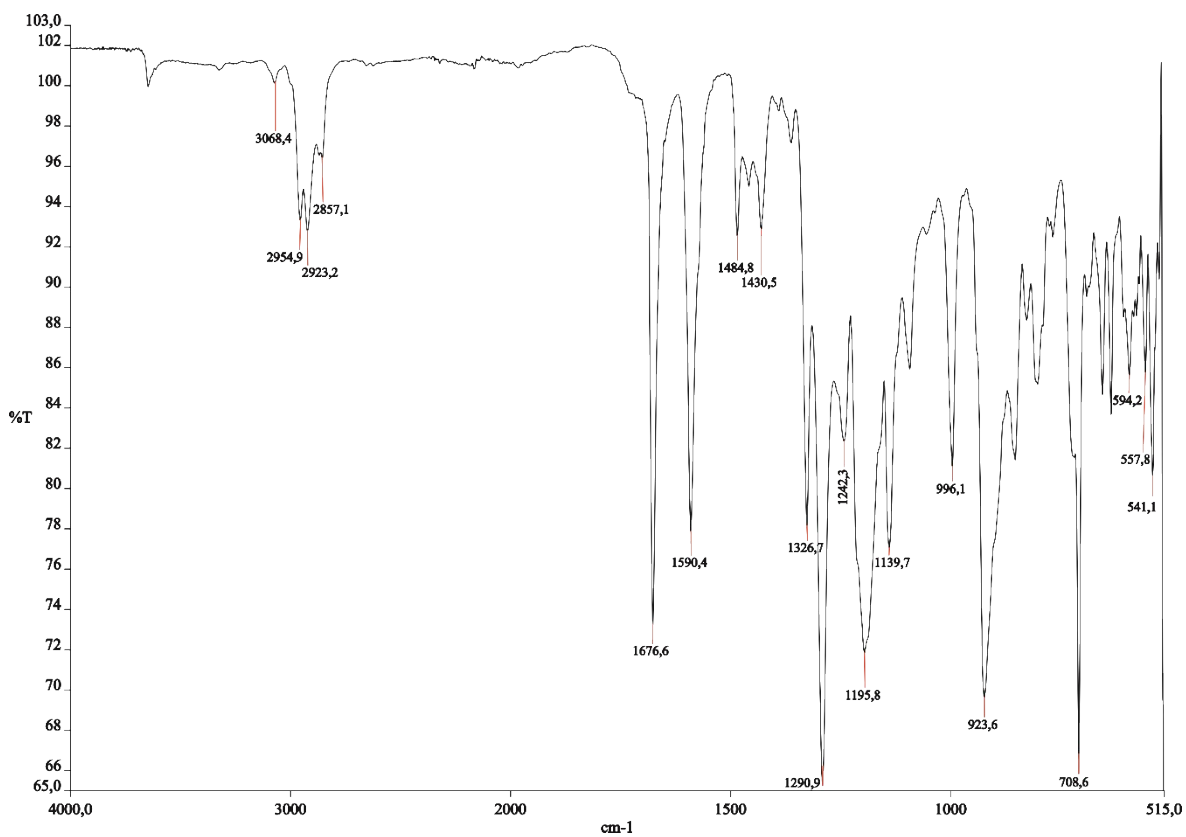

**Figure S5.** FT-IR spectra of Compound 6

# COMPOUND 7

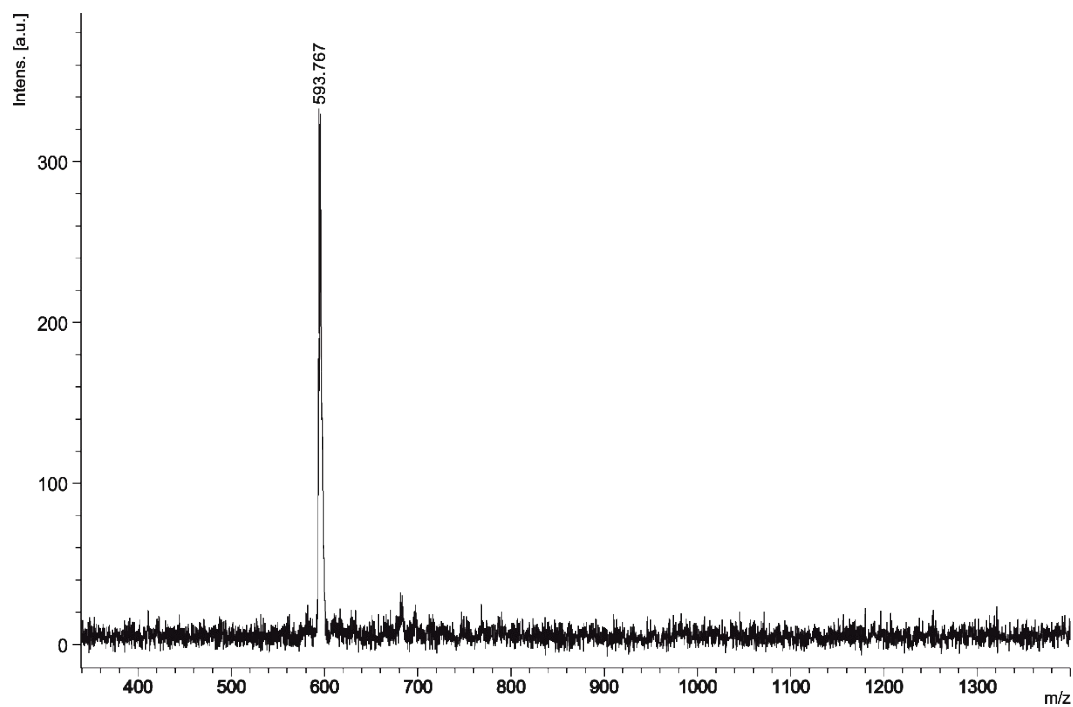

Figure S6. MALDI-MS spectra of Compound 7

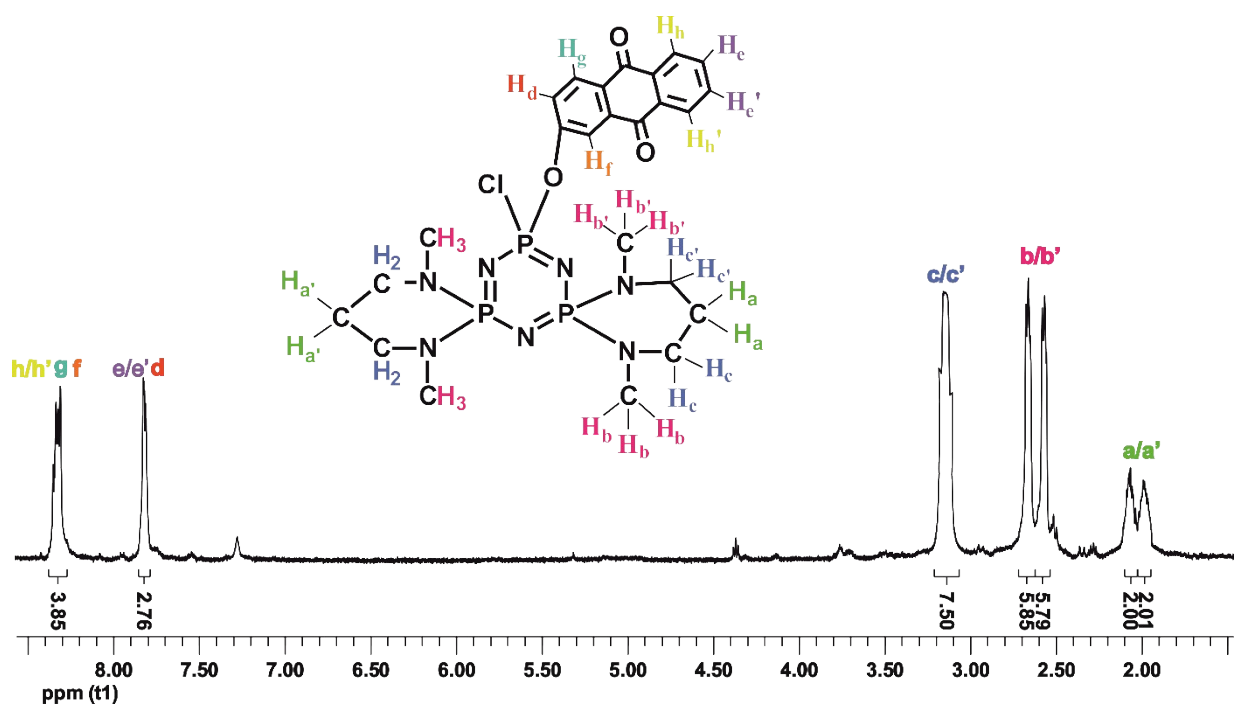

Figure S7. <sup>1</sup>H NMR spectra of Compound 7 in CDCl<sub>3</sub>

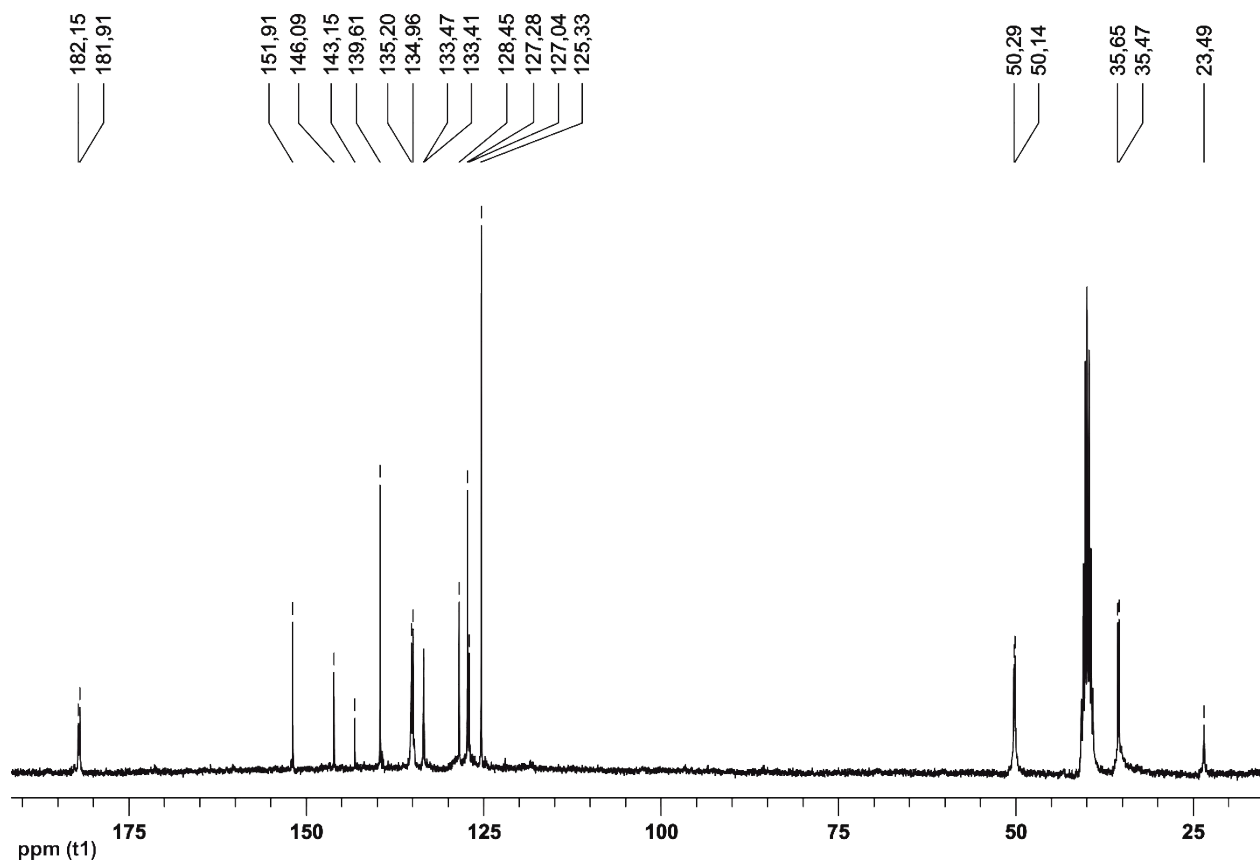

**Figure S8.**  $^{13}\text{C}$  NMR spectra of Compound 7 in  $\text{DMSO-d}_6$

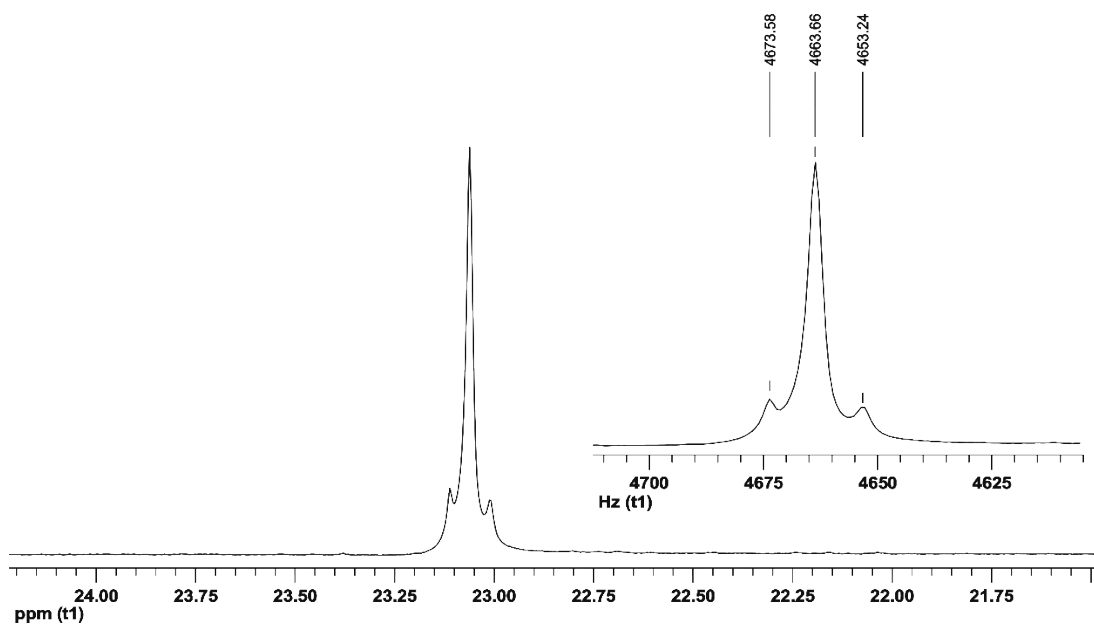

**Figure S9.**  $^{31}\text{P}$  NMR decoupled spectra of Compound 7 in  $\text{CDCl}_3$



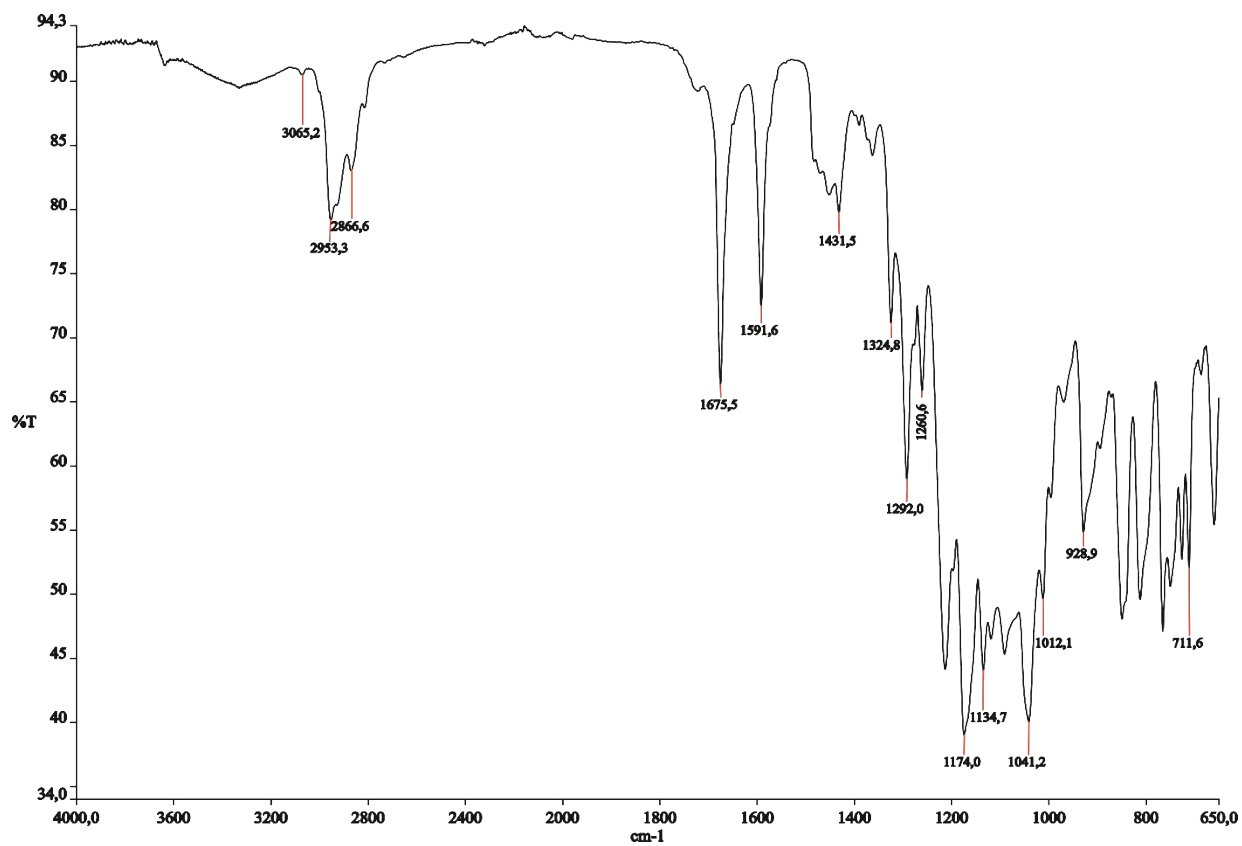

Figure S10. FT-IR spectra of Compound 7

## COMPOUND 8

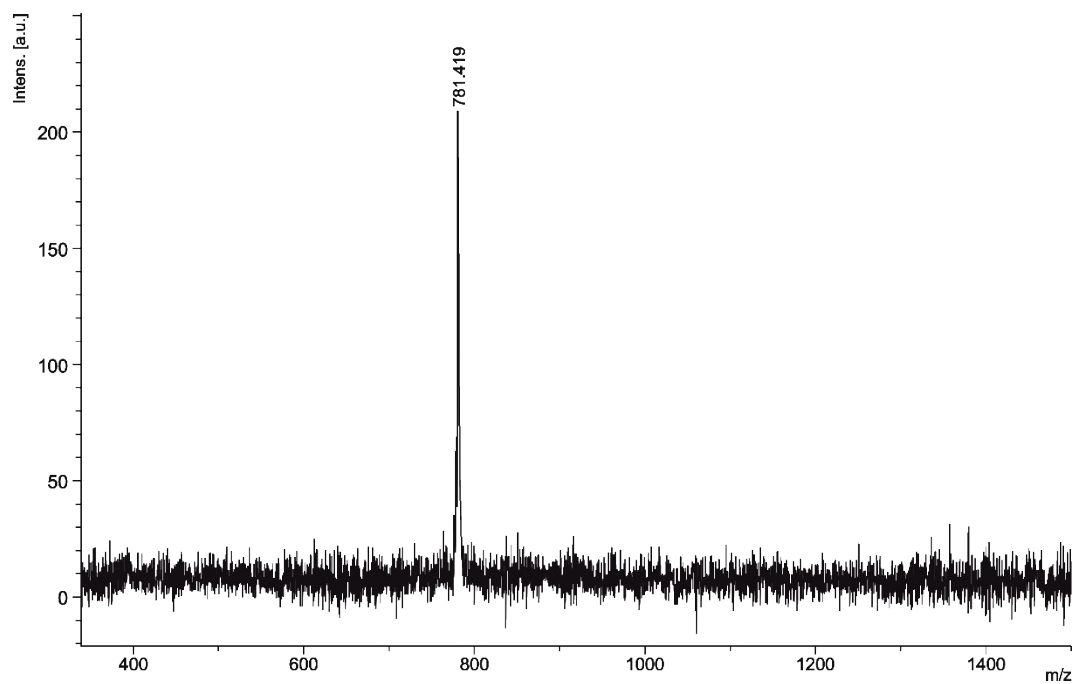

Figure S11. MALDI-MS spectra of Compound 8

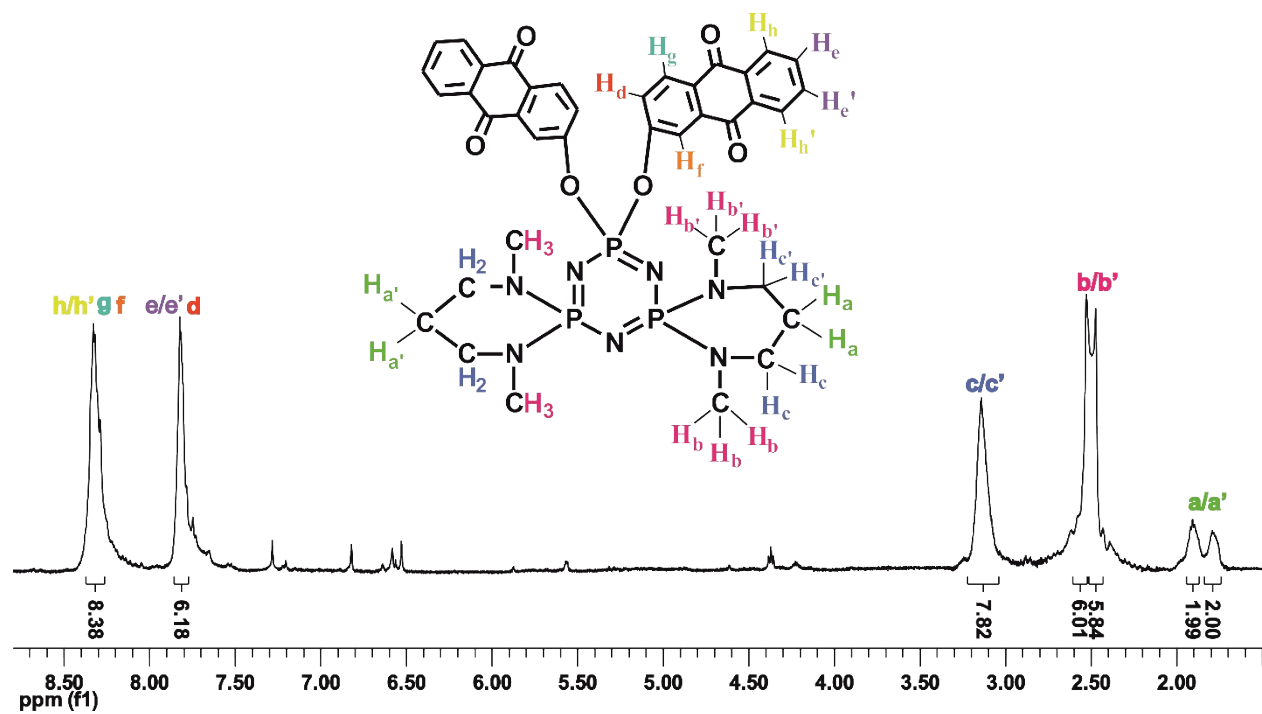

Figure S12. <sup>1</sup>H NMR spectra of Compound 8 in CDCl<sub>3</sub>

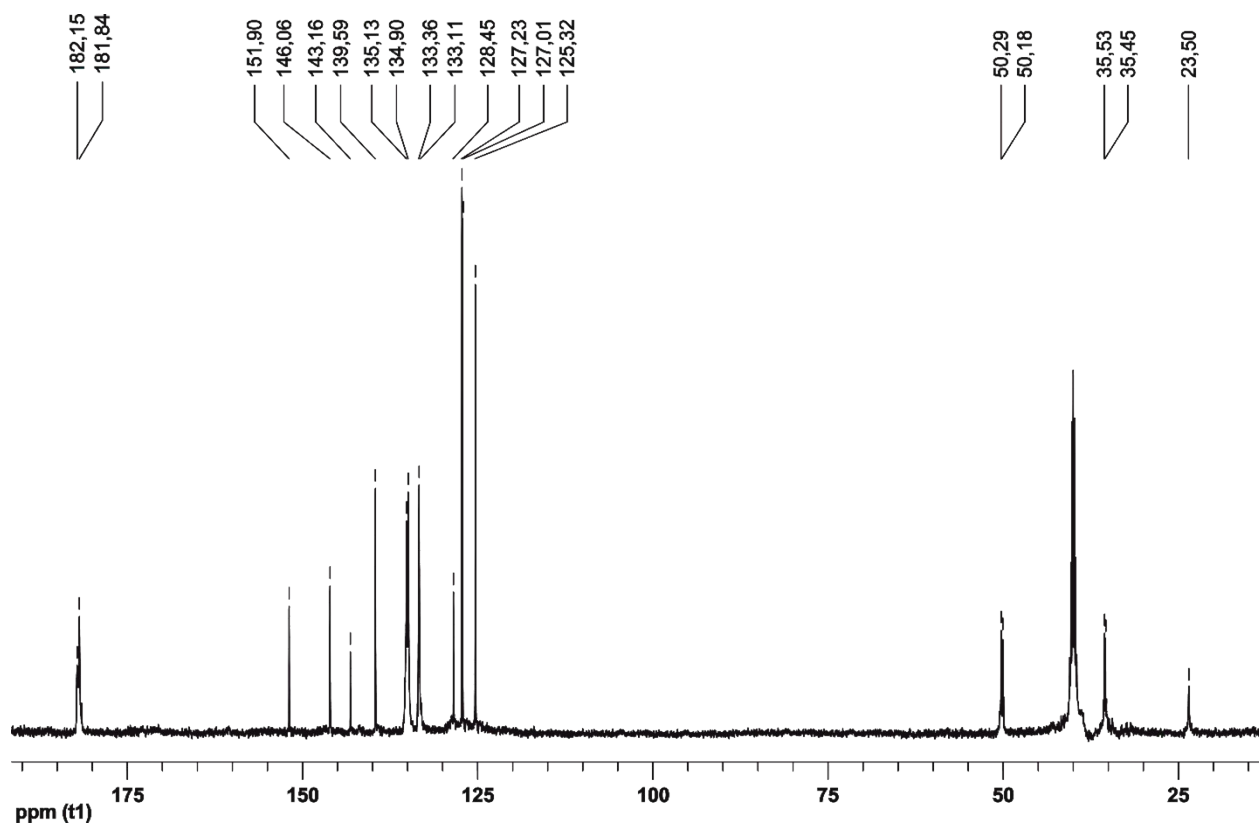

Figure S13.  $^{13}\text{C}$  NMR spectra of Compound 8 in  $\text{DMSO-d}_6$

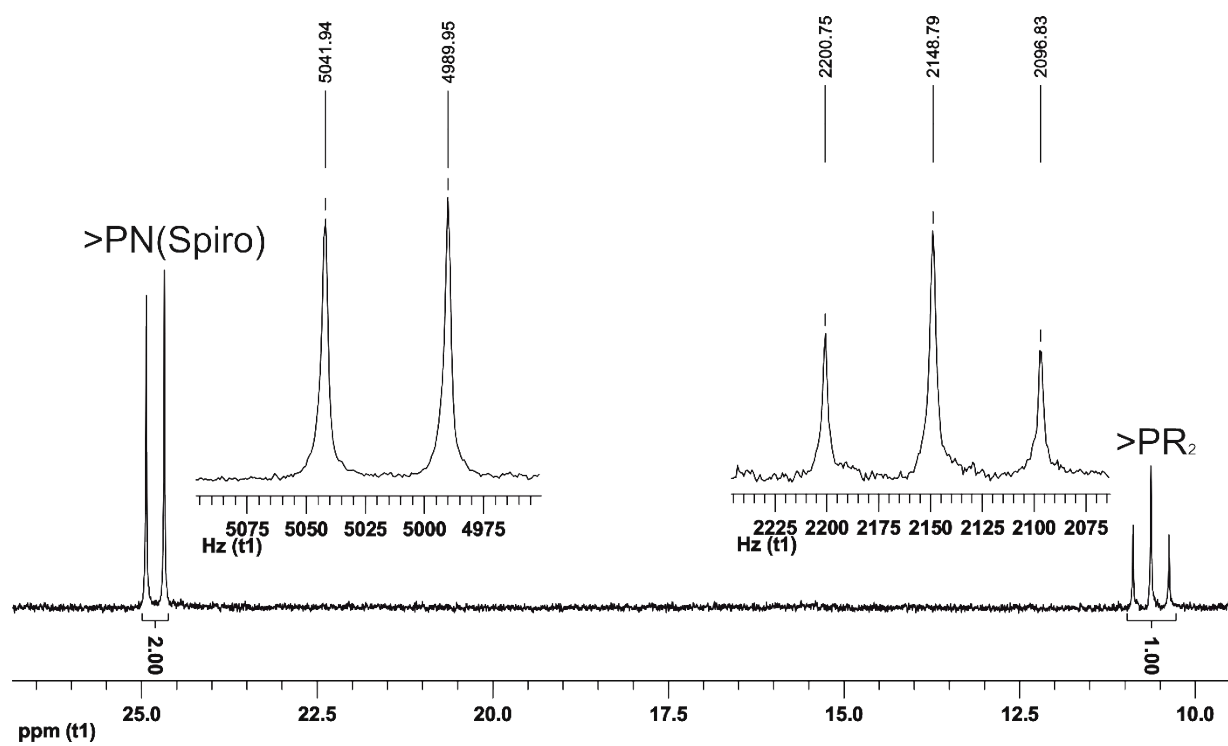

Figure S14.  $^{31}\text{P}$  NMR decoupled spectra of Compound 8 in  $\text{CDCl}_3$

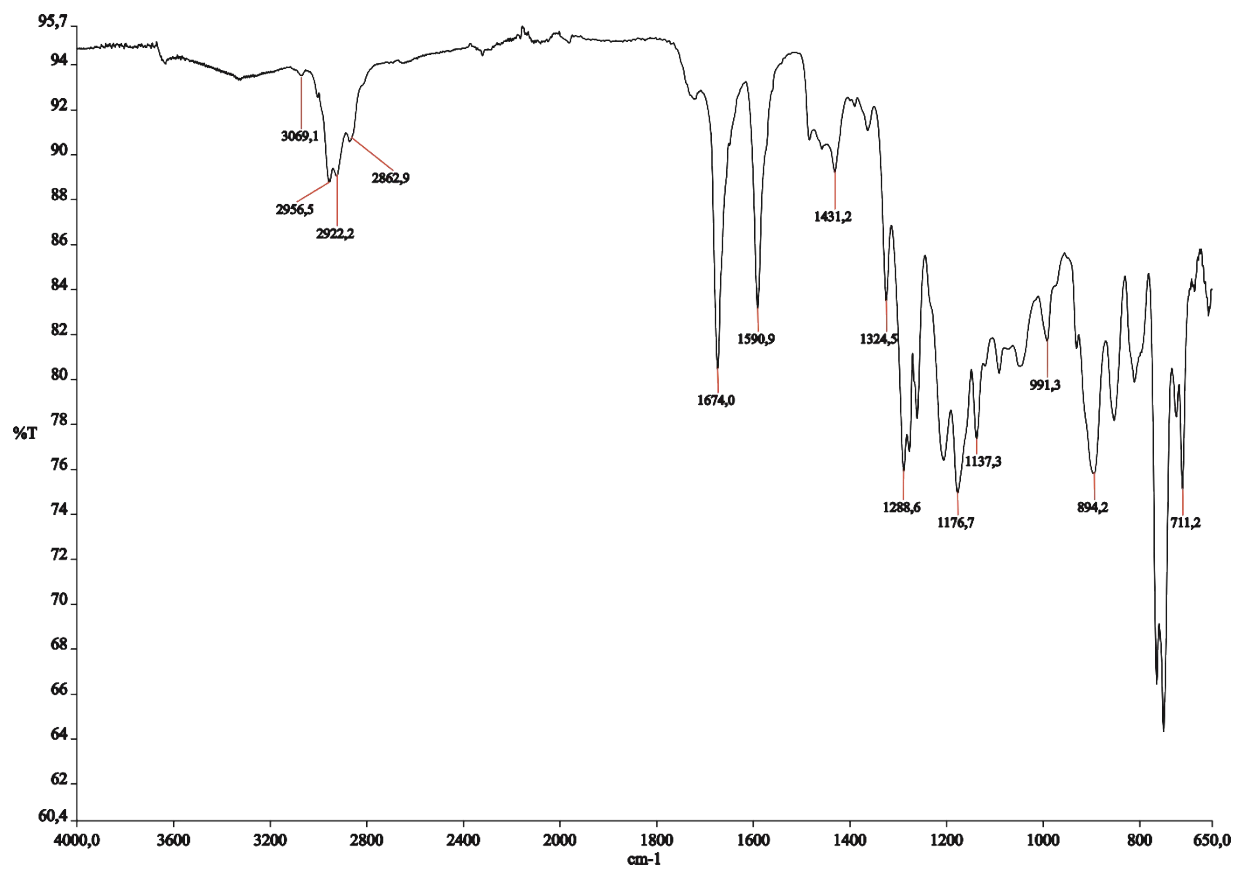

Figure S15. FT-IR spectra of Compound 8

## COMPOUND 9

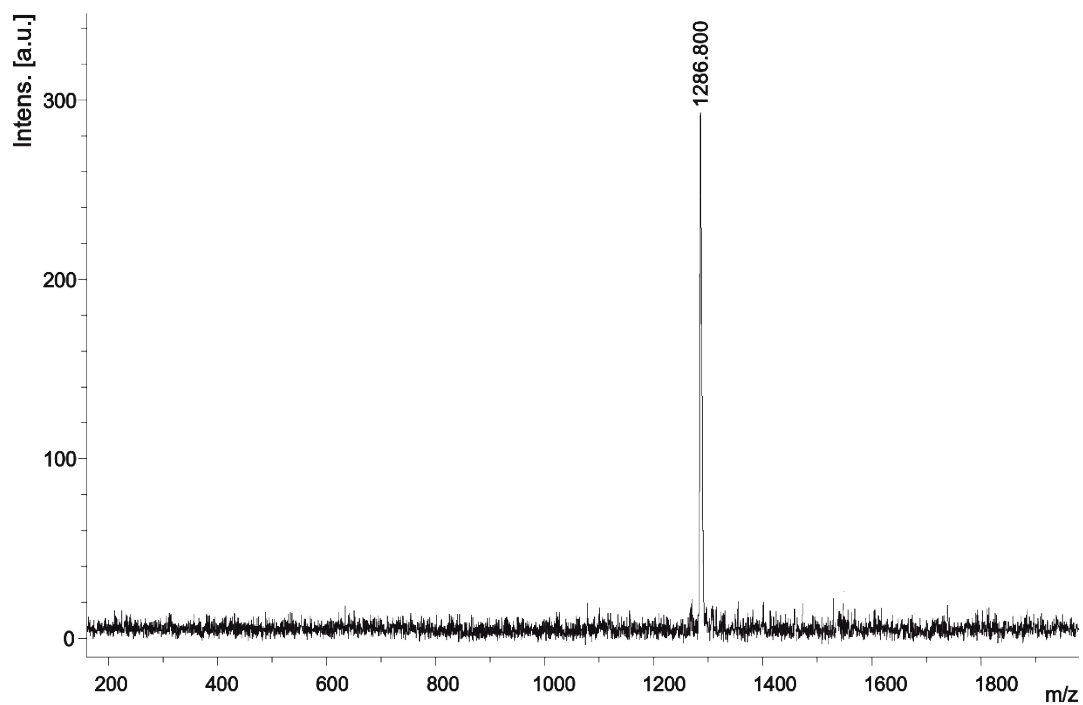

Figure S16. MALDI-MS spectra of Compound 9

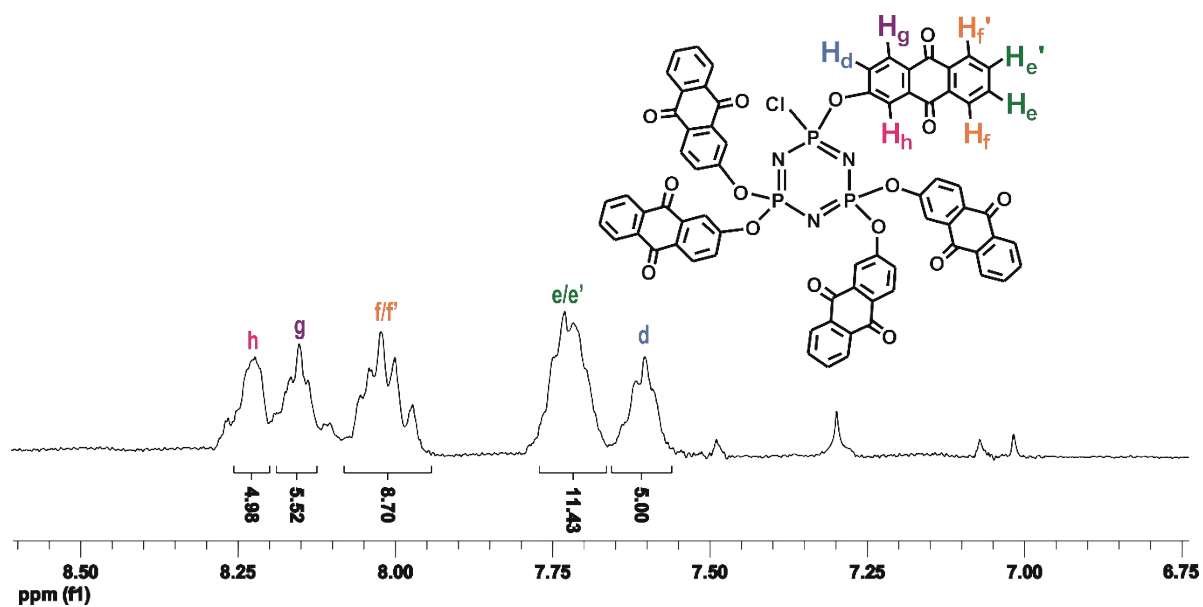

Figure S17. <sup>1</sup>H NMR spectra of Compound 9 in CDCl<sub>3</sub>

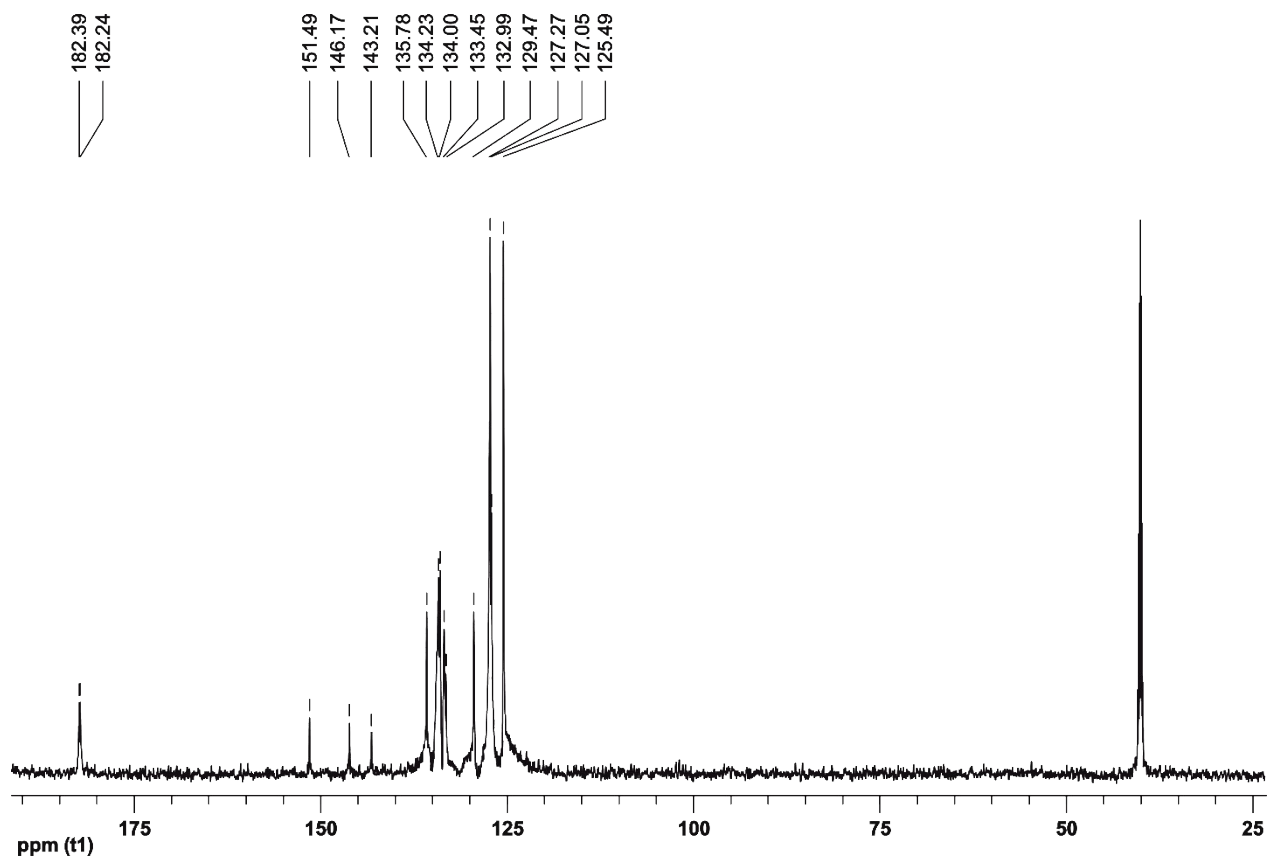

Figure S18.  $^{13}\text{C}$  NMR spectra of Compound 9 in  $\text{DMSO-d}_6$

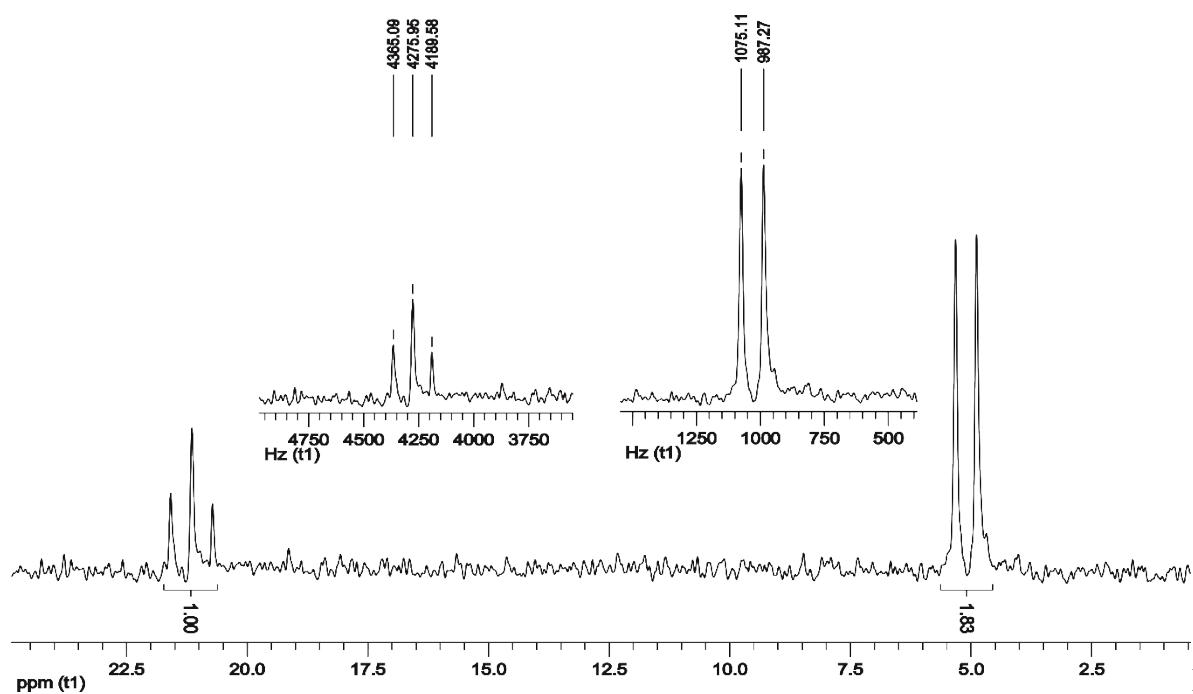

re S19.  $^{31}\text{P}$  NMR decoupled spectra of Compound 9 in  $\text{CDCl}_3$

Figu

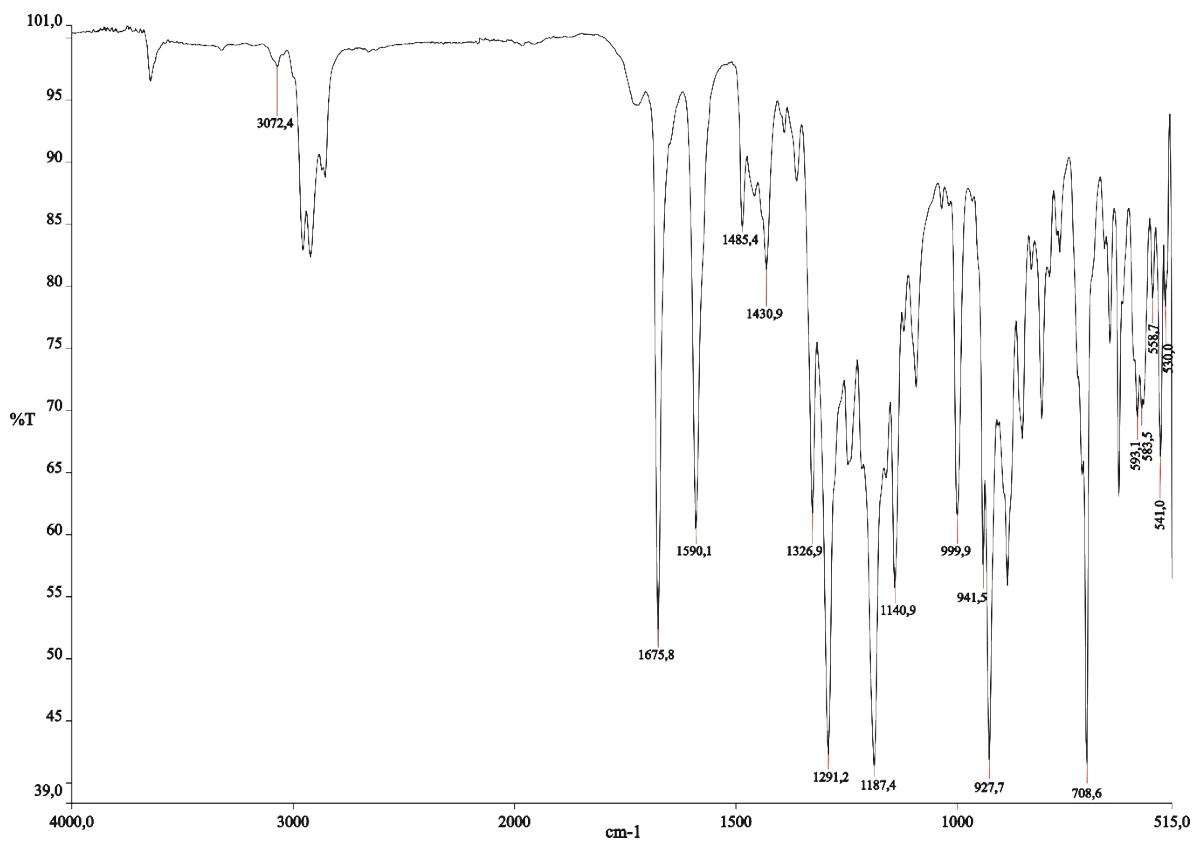

**Figure S20.** FT-IR spectra of Compound 9

**Figure S21.** Graphics of the concentrations values of compounds applied in the MCF-7 and MCF12A cell lines according to viability (%) with MTT method.

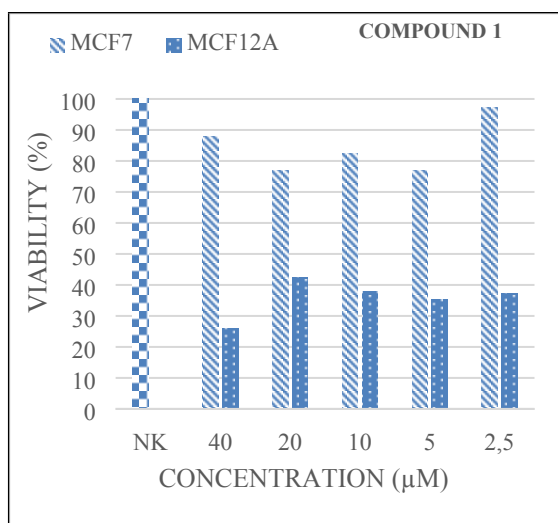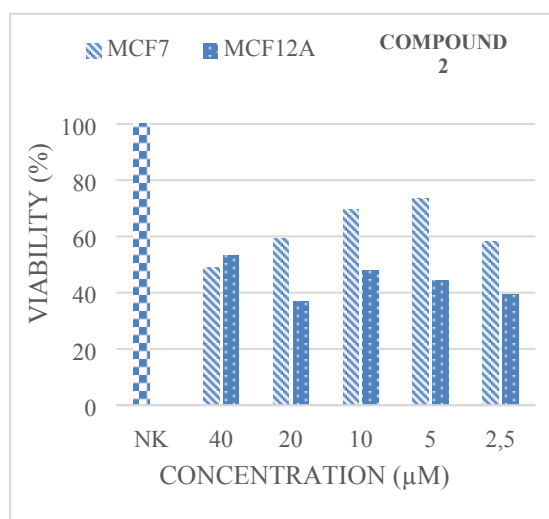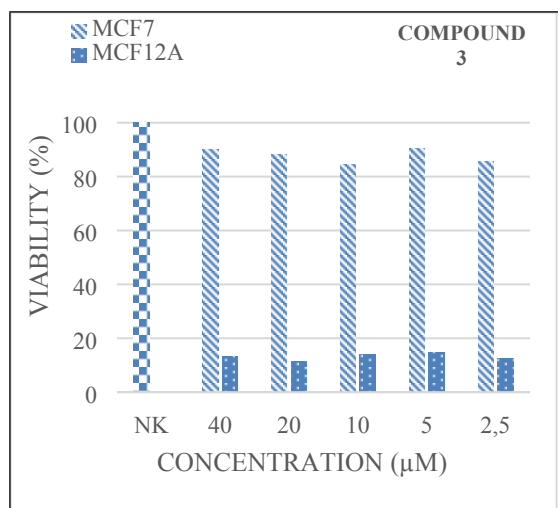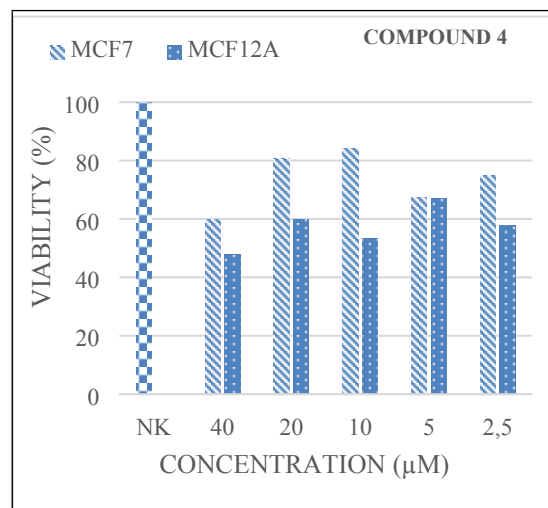



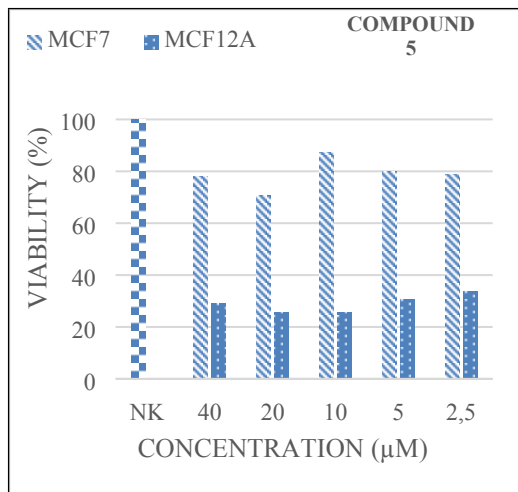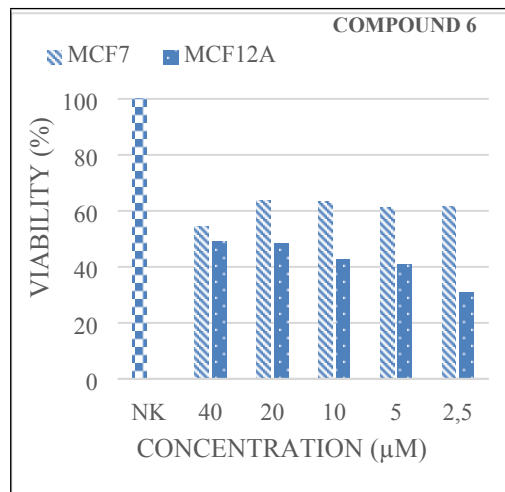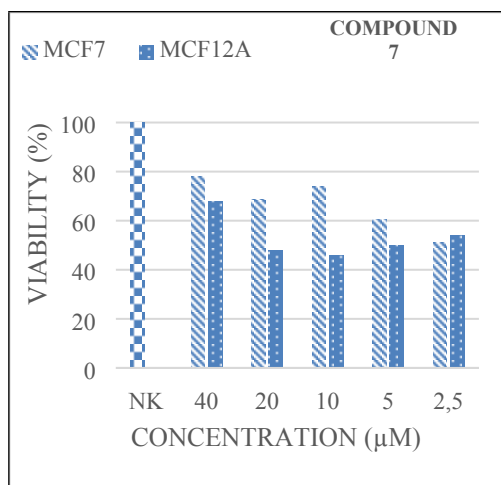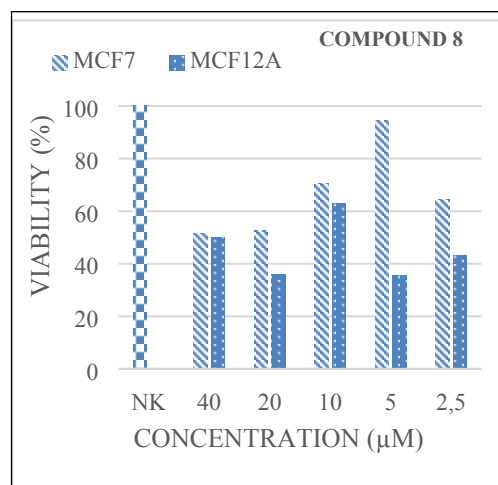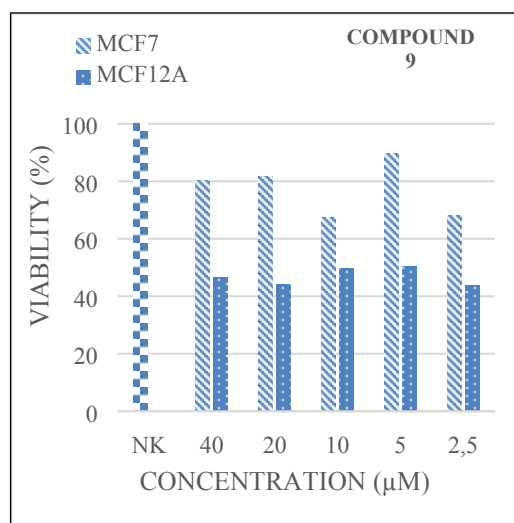

**Figure S22.** MTT analysis results of compounds in cells. Graphics of the concentrations of compounds applied in the DLD1 and CCD-18CO cell lines according to absorbance with MTT method

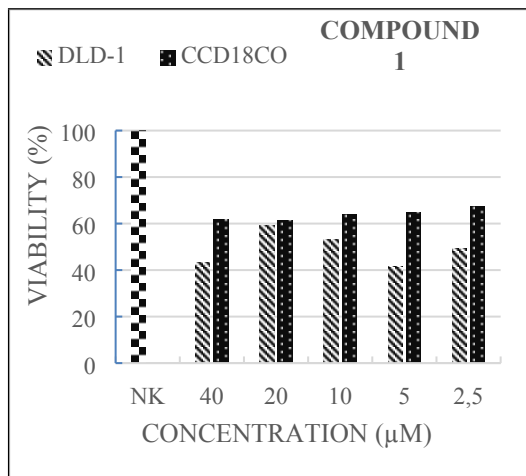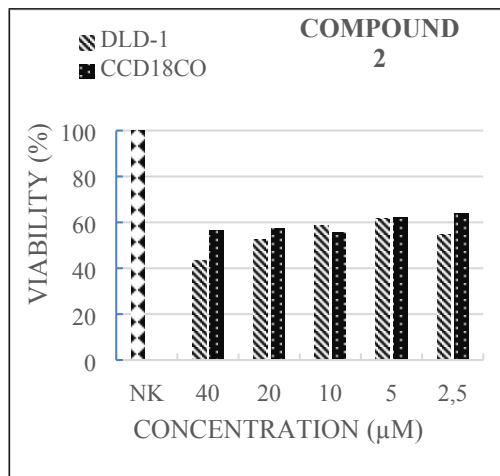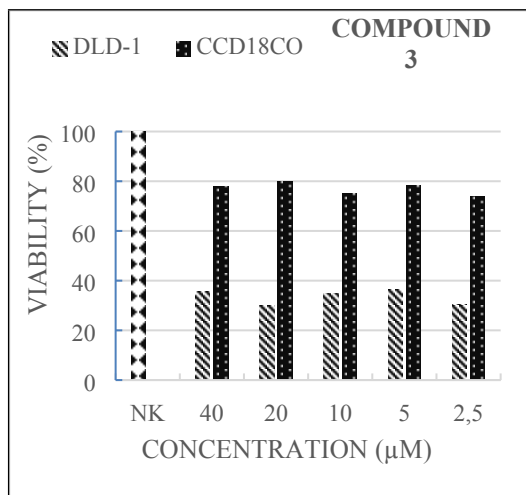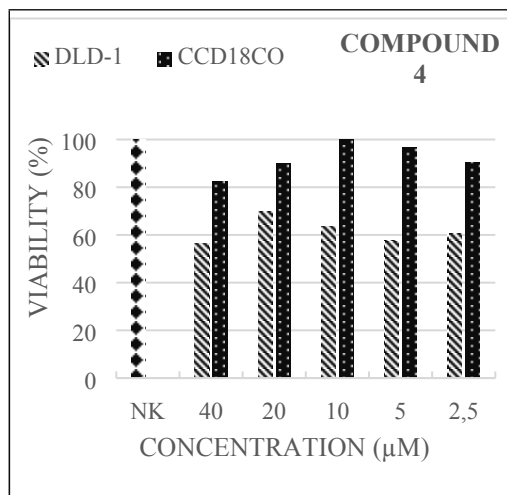

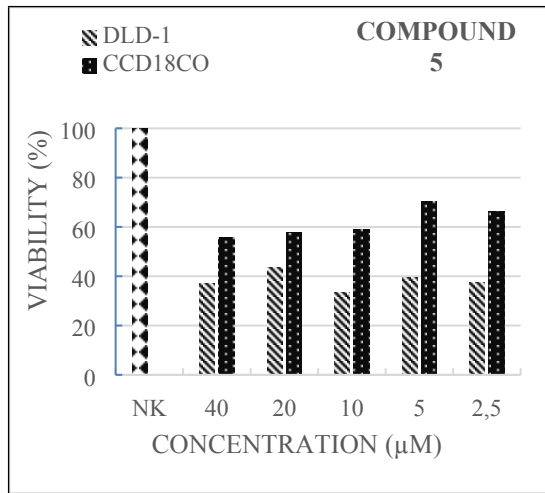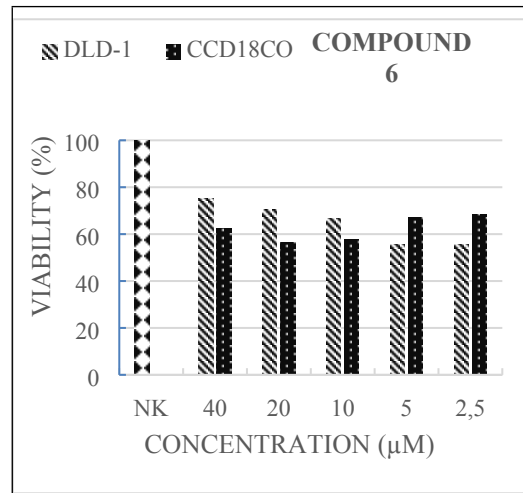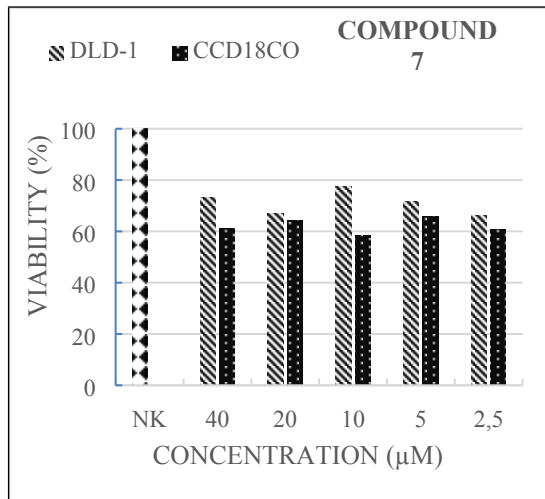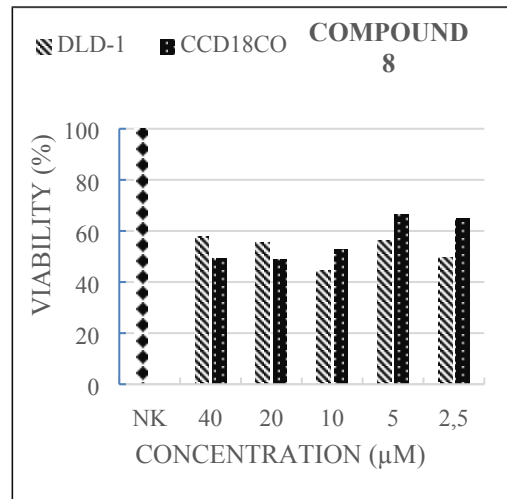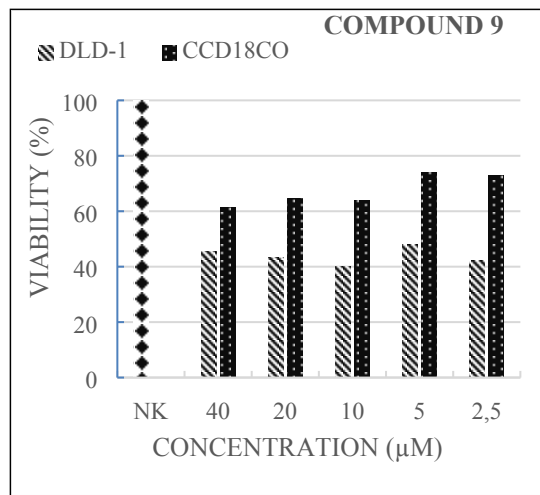

**Table S1.** Selectivity of the cytotoxicity of anthraquinone derivatives compounds to two cancer cells as compared with normal cells.

| Compound No | IC <sub>50</sub> (μM) <sup>a</sup> |         |       |          |
|-------------|------------------------------------|---------|-------|----------|
|             | MCF-7                              | MCF-12A | DLD-1 | CCD-18Co |
| 1           | 20                                 | 20      | 40    | 20       |
| 2           | 40                                 | 40      | 20    | 10       |
| 3           | 10                                 | 5       | 40    | 2.5      |
| 4           | 40                                 | 10      | 5     | 40       |
| 5           | 20                                 | 2.5     | 20    | 40       |
| 6           | 40                                 | 40      | 5     | 20       |
| 7           | 2.5                                | 40      | 40    | 10       |
| 8           | 40                                 | 10      | 2.5   | 40       |
| 9           | 10                                 | 5       | 10    | 40       |

<sup>a</sup>The selectivity index is the ratio of the IC<sub>50</sub> values of the treatments on normal cells to those in the cancer cell lines.
